# Supplementary material for: Influence of Water Temperature and Flow Velocity on Locomotion Behavior in Tropical Commercially Important Sea Cucumber Stichopus monotuberculatus
Source: Frontiers journal article supplement (doi:10.3389/fmars.2022.931430), 2022-07-11
Supplement: Table_1.XLSX [file Table_1.XLSX]

## Sheet: Fig. 2
原始数据							22℃	25℃	28℃	31℃
第一天5只花刺参各时间段的运动距离平均值（cm)						白天	66.47	25.47	36.58	105.17
时间段	22℃	25℃	28℃	31℃		sd	52.7727	20.4024	25.391	52.4562
0:00-02:00	55.986	11.874	16.262	44.892		夜晚	139.33	132.93	82.58	321.12
02:00-04:00	42.906	6.24	18.862	37.122		sd	40.4379	83.651	25.847	66.206
04:00-06:00	21.092	4.55	17.84	46.136
06:00-08:00	18.832	8.646	10.394	57.132
08:00-10:00	1.58	3.2	7.802	12.536
10:00-12:00	0.426	0	0.514	2.142
12:00-14:00	1.778	0	0	3.586
14:00-16:00	0.574	1.036	0.432	0.538
16:00-18:00	0.402	2.538	1.024	0
18:00-20:00	2.172	2.834	10.992	33.482
20:00-22:00	0.74	19.88	24.558	35.748
22:00-24:00	0.696	11.062	11.196	55.574
第二天5只花刺参各时间段的运动距离平均值（cm)
时间段	22℃	25℃	28℃	31℃
0:00-02:00	2.574	10.34	14.856	54.628
02:00-04:00	12.208	11.448	16.932	39.528
04:00-06:00	11.678	17.01	0.924	40.398
06:00-08:00	0	1.952	0.83	48.834
08:00-10:00	1.028	1.476	22.262	11.196
10:00-12:00	11.204	2.1	28.208	18.274
12:00-14:00	6.146	0.482	2.458	21.906
14:00-16:00	7.506	0.488	0	11.612
16:00-18:00	7.31	0.44	4.412	3.076
18:00-20:00	18.522	18.72	9.67	49.662
20:00-22:00	35.676	2.626	42.9	118.054
22:00-24:00	24.742	0.836	25.714	62.498
第三天5只花刺参各时间段的运动距离平均值（cm)
时间段	22℃	25℃	28℃	31℃
0:00-02:00	19.616	6.926	9.628	95.566
02:00-04:00	15.298	40.788	11.22	95.336
04:00-06:00	12.01	8.386	0.45	57.774
06:00-08:00	2.27	0.502	0	18.298
08:00-10:00	10.722	0.966	0	27.454
10:00-12:00	1.62	0	0.434	7.72
12:00-14:00	8.468	0.402	0	0
14:00-16:00	4.814	1.378	0	0
16:00-18:00	12.34	6.706	0	0.82
18:00-20:00	18.382	14.726	5.71	42.998
20:00-22:00	35.118	8.566	0.486	63.97
22:00-24:00	26.822	40.554	10.44	36.004
第四天5只花刺参各时间段的运动距离平均值（cm)
时间段	22℃	25℃	28℃	31℃
0:00-02:00	18.788	26.812	16.146	75.918
02:00-04:00	37.18	68.006	22.942	26.618
04:00-06:00	37.068	18.592	10.38	37.94
06:00-08:00	41.48	0.664	6.354	18.668
08:00-10:00	15.524	0	8.068	10.172
10:00-12:00	2.588	0.756	31.744	25.682
12:00-14:00	0.586	1.664	6.298	21.118
14:00-16:00	12.86	3.226	2.1775	3.514
16:00-18:00	10.968	39.184	3.364	11.246
18:00-20:00	19.332	16.184	4.31	33.61
20:00-22:00	7.808	11.406	7.882	105.256
22:00-24:00	10.712	29.22	6.316	68.518
第五天5只花刺参各时间段的运动距离平均值（cm)
时间段	22℃	25℃	28℃	31℃
0:00-02:00	15.468	32.706	13.134	55.188
02:00-04:00	17.934	51.598	8.49	67.466
04:00-06:00	32.476	48.818	34.83	50.626
06:00-08:00	55.812	25.862	20.108	92.084
08:00-10:00	30.652	1.988	13.184	70.906
10:00-12:00	15.234	0.932	10.13	24.202
12:00-14:00	9.186	0	0.746	0.87
14:00-16:00	23.04	5.026	0.726	2.258
16:00-18:00	17.388	15.722	0.506	0
18:00-20:00	36.696	66.94	19.146	21.688
20:00-22:00	58.788	35.49	8.978	29.462
22:00-24:00	48.144	21.488	12.498	23.944
