# Supplementary material for: Influence of Water Temperature and Flow Velocity on Locomotion Behavior in Tropical Commercially Important Sea Cucumber Stichopus monotuberculatus
Source: Frontiers journal article supplement (doi:10.3389/fmars.2022.931430), 2022-07-11
Supplement: Table_2.XLSX [file Table_2.XLSX]

## Sheet: Sheet1
原始数据
第一天5值花刺参各时间段的累计运动时间平均值）							22℃	25℃	28℃	31℃
时间段	22℃	25℃	28℃	31℃		白天	48	18.12	27.6	73.32
0:00-02:00	2304	684	936	1800		sd	30.3875	11.5366	19.064	31.6053
02:00-04:00	1764	360	1008	1584		夜晚	99.24	86.28	69.96	195
04:00-06:00	576	324	648	1944		sd	31.7762	47.3114	21.3021	18.6965
06:00-08:00	936	432	684	1980
08:00-10:00	108	216	576	540
10:00-12:00	36	0	0	144
12:00-14:00	108	0	0	252
14:00-16:00	36	72	0	36
16:00-18:00	36	180	0	0
18:00-20:00	144	180	720	1188
20:00-22:00	36	648	1188	1584
22:00-24:00	36	504	792	2052
第一天5值花刺参各时间段的累计运动时间平均值）
时间段	22℃	25℃	28℃	31℃
0:00-02:00	180	648	828	2232
02:00-04:00	504	432	756	1800
04:00-06:00	468	756	36	1980
06:00-08:00	0	108	72	1944
08:00-10:00	72	108	828	576
10:00-12:00	576	108	1260	1116
12:00-14:00	396	36	180	1188
14:00-16:00	396	36	0	684
16:00-18:00	432	36	252	180
18:00-20:00	1008	576	540	1692
20:00-22:00	1080	180	1944	2844
22:00-24:00	1044	72	792	1836
第一天5值花刺参各时间段的累计运动时间平均值）
时间段	22℃	25℃	28℃	31℃
0:00-02:00	1044	396	504	3096
02:00-04:00	792	1800	468	2664
04:00-06:00	648	468	36	1836
06:00-08:00	108	36	0	720
08:00-10:00	540	72	0	900
10:00-12:00	108	0	36	432
12:00-14:00	396	36	0	0
14:00-16:00	324	72	0	0
16:00-18:00	648	252	0	72
18:00-20:00	864	864	288	1476
20:00-22:00	1224	324	36	1656
22:00-24:00	1008	1008	612	1656
第一天5值花刺参各时间段的累计运动时间平均值）
时间段	22℃	25℃	28℃	31℃
0:00-02:00	1080	1008	936	2664
02:00-04:00	1548	1908	1224	1224
04:00-06:00	1404	828	540	1584
06:00-08:00	1260	36	288	936
08:00-10:00	756	0	360	432
10:00-12:00	180	36	1296	1224
12:00-14:00	36	108	108	1116
14:00-16:00	576	180	72	216
16:00-18:00	468	1440	180	576
18:00-20:00	792	684	216	1512
20:00-22:00	468	576	468	3348
22:00-24:00	576	1152	396	2376
第一天5值花刺参各时间段的累计运动时间平均值）
时间段	22℃	25℃	28℃	31℃
0:00-02:00	792	1224	900	2268
02:00-04:00	1008	1908	468	2736
04:00-06:00	1188	1980	1656	1800
06:00-08:00	1656	792	792	3132
08:00-10:00	1260	108	612	2664
10:00-12:00	720	72	576	756
12:00-14:00	540	0	36	72
14:00-16:00	1080	216	36	108
16:00-18:00	612	648	36	0
18:00-20:00	1620	1944	864	1152
20:00-22:00	2484	1404	576	1620
22:00-24:00	2088	1044	612	1296
