# Supplementary material for: Influence of Water Temperature and Flow Velocity on Locomotion Behavior in Tropical Commercially Important Sea Cucumber Stichopus monotuberculatus
Source: Frontiers journal article supplement (doi:10.3389/fmars.2022.931430), 2022-07-11
Supplement: Table_3.XLSX [file Table_3.XLSX]

## Sheet: Sheet1
各时间段平均运动距离，厘米（5只，5天）					累计运动时间，分钟（5只，5天均值）
	22℃	25℃	28℃	31℃		22℃	25℃	28℃	31℃
0:00-02:00	22.4864	17.7316	13.836	65.2384	0:00-02:00	18	13.2	13.68	40.2
02:00-04:00	25.1052	35.616	15.7212	53.214	02:00-04:00	18.72	21.36	13.08	33.36
04:00-06:00	22.8648	19.4712	11.758	46.5748	04:00-06:00	14.28	14.52	9.72	30.48
06:00-08:00	23.6788	7.5252	7.6836	47.0032	06:00-08:00	13.2	4.68	6.12	29.04
08:00-10:00	11.9012	1.526	10.66	26.4528	08:00-10:00	9.12	1.68	7.92	17.04
10:00-12:00	6.2144	0.7576	14.1032	15.604	10:00-12:00	5.4	0.72	10.56	12.24
12:00-14:00	5.2328	0.5096	1.9004	9.496	12:00-14:00	4.92	0.6	1.08	8.76
14:00-16:00	9.7588	2.2308	0.5807	3.5844	14:00-16:00	8.04	1.92	0.36	3.48
16:00-18:00	9.6816	12.918	1.6564	3.0284	16:00-18:00	7.32	8.52	1.56	2.76
18:00-20:00	19.0208	23.8808	10.2272	36.288	18:00-20:00	14.76	14.16	8.76	23.4
20:00-22:00	27.626	15.5936	17.1608	70.498	20:00-22:00	17.64	10.44	14.04	36.84
22:00-24:00	22.2232	20.632	13.8724	49.3076	22:00-24:00	15.84	12.6	10.68	30.72
平均运动速度，cm/min					平均运动速度，cm/s
	22℃	25℃	28℃	31℃		22℃	25℃	28℃	31℃
0:00-02:00	74.9547	80.5982	60.6842	97.3707	Day	1.30827	1.18265	1.39524	1.27618
02:00-04:00	80.4654	100.045	72.1156	95.7086	sd	0.256748	0.314937	0.251767	0.254194
04:00-06:00	96.0706	80.4595	72.5802	91.6827	night	1.40821	1.52822	1.18528	1.63592
06:00-08:00	107.631	96.4769	75.3294	97.114	sd	0.145779	0.159251	0.0956067	0.140566
08:00-10:00	78.2974	54.5	80.7576	93.1437
10:00-12:00	69.0489	63.1333	80.1318	76.4902
12:00-14:00	63.8146	50.96	105.578	65.0411
14:00-16:00	72.8269	69.7125	96.7833	61.8
16:00-18:00	79.3574	90.9718	63.7077	65.8348
18:00-20:00	77.3203	101.19	70.0493	93.0462
20:00-22:00	93.966	89.6184	73.3368	114.818
22:00-24:00	84.1788	98.2476	77.9348	96.3039
平均运动速度，cm/s
	22℃	25℃	28℃	31℃
0:00-02:00	1.24924	1.3433	1.0114	1.62285
02:00-04:00	1.34109	1.66742	1.20193	1.59514
04:00-06:00	1.60118	1.34099	1.20967	1.52804
06:00-08:00	1.79385	1.60795	1.25549	1.61857
08:00-10:00	1.30496	0.908333	1.34596	1.55239
10:00-12:00	1.15081	1.05222	1.33553	1.27484
12:00-14:00	1.06358	0.849333	1.75963	1.08402
14:00-16:00	1.21378	1.16187	1.61306	1.03
16:00-18:00	1.32262	1.5162	1.06179	1.09725
18:00-20:00	1.28867	1.6865	1.16749	1.55077
20:00-22:00	1.5661	1.49364	1.22228	1.91363
22:00-24:00	1.40298	1.63746	1.29891	1.60507
