# Supplementary material for: Influence of Water Temperature and Flow Velocity on Locomotion Behavior in Tropical Commercially Important Sea Cucumber Stichopus monotuberculatus
Source: Frontiers journal article supplement (doi:10.3389/fmars.2022.931430), 2022-07-11
Supplement: Table_4.XLSX [file Table_4.XLSX]

## Sheet: 图5
									第一天5只花刺参的平均值	运动距离，厘米
										22℃	25℃	28℃	31℃
5天各时间段运动距离（cm）									0:00-02:00	55.986	11.874	15.416	44.892
	平均运动距离	SD	平均运动距离	SD	平均运动距离	SD	平均运动距离	SD	02:00-04:00	42.906	6.24	19.022	37.122
									04:00-06:00	21.092	4.55	12.206	46.136
	22℃		25℃		28℃		31℃		06:00-08:00	18.832	8.646	11.126	57.132
06:00-08:00	23.6788	24.4537	7.5252	10.7814	7.6836	8.27637	47.0032	30.6802	08:00-10:00	1.58	3.2	9.786	12.536
08:00-10:00	11.9012	12.1538	1.526	1.18959	10.66	8.09467	26.4528	25.8293	10:00-12:00	0.426	0	0	2.142
10:00-12:00	6.2144	6.59572	0.7576	0.863188	14.1032	15.097	15.604	10.3199	12:00-14:00	1.778	0	0	3.586
12:00-14:00	5.2328	3.88769	0.5096	0.682708	1.9004	2.65544	9.496	11.052	14:00-16:00	0.574	1.036	0	0.538
14:00-16:00	9.7588	8.65873	2.2308	1.87054	0.5807	0.946377	3.5844	4.69934	16:00-18:00	0.402	2.538	0	0
16:00-18:00	9.6816	6.32151	12.918	15.8098	1.6564	2.08086	3.0284	4.76316	18:00-20:00	2.172	2.834	12.3	33.482
18:00-20:00	19.0208	12.2173	23.8808	24.8332	10.2272	5.90699	36.288	10.6312	20:00-22:00	0.74	19.88	25.558	35.748
20:00-22:00	27.626	23.4926	15.5936	12.7409	17.1608	17.0596	70.498	40.0119	22:00-24:00	0.696	11.062	14.394	55.574
22:00-24:00	22.2232	17.9952	20.632	15.4502	13.8724	7.26748	49.3076	18.7256	第二天5只花刺参的平均值	运动距离
0:00-02:00	22.4864	19.9368	17.7316	11.3181	13.836	2.60158	65.2384	20.38		22℃	25℃	28℃	31℃
02:00-04:00	25.1052	13.9339	35.616	26.3549	15.7212	5.85347	53.214	27.9776	0:00-02:00	2.574	10.34	14.856	54.628
04:00-06:00	22.8648	11.6213	19.4712	17.4183	11.758	13.9612	46.5748	7.98028	02:00-04:00	12.208	11.448	16.932	39.528
									04:00-06:00	11.678	17.01	0.924	40.398
									06:00-08:00	0	1.952	0.83	48.834
									08:00-10:00	1.028	1.476	22.262	11.196
									10:00-12:00	11.204	2.1	28.208	18.274
									12:00-14:00	6.146	0.482	2.458	21.906
									14:00-16:00	7.506	0.488	0	11.612
									16:00-18:00	7.31	0.44	4.412	3.076
									18:00-20:00	18.522	18.72	9.67	49.662
									20:00-22:00	35.676	2.626	42.9	118.054
									22:00-24:00	24.742	0.836	25.714	62.498
									第三天5只花刺参的平均值	运动距离
										22℃	25℃	28℃	31℃
									0:00-02:00	19.616	6.926	9.628	95.566
									02:00-04:00	15.298	40.788	11.22	95.336
									04:00-06:00	12.01	8.386	0.45	57.774
									06:00-08:00	2.27	0.502	0	18.298
									08:00-10:00	10.722	0.966	0	27.454
									10:00-12:00	1.62	0	0.434	7.72
									12:00-14:00	8.468	0.402	0	0
									14:00-16:00	4.814	1.378	0	0
									16:00-18:00	12.34	6.706	0	0.82
第一天5只花刺参的平均值	运动距离，厘米								18:00-20:00	18.382	14.726	5.71	42.998
	22℃					AVE	MIN	25PERCENTILE	20:00-22:00	35.118	8.566	0.486	63.97
0:00-02:00	55.986	2.574	19.616	18.788	15.468	22.4864	2.574	4.697	22:00-24:00	26.822	40.554	10.44	36.004
02:00-04:00	42.906	12.208	15.298	37.18	17.934	25.1052	12.208	4.4835	第四天5只花刺参的平均值	运动距离
04:00-06:00	21.092	11.678	12.01	37.068	32.476	22.8648	11.678	5.273		22℃	25℃	28℃	31℃
06:00-08:00	18.832	0	2.27	41.48	55.812	23.6788	0	4.708	0:00-02:00	18.788	26.812	16.146	75.918
08:00-10:00	1.58	1.028	10.722	15.524	30.652	11.9012	1.028	2.6805	02:00-04:00	37.18	68.006	22.942	26.618
10:00-12:00	0.426	11.204	1.62	2.588	15.234	6.2144	0.426	0.647	04:00-06:00	37.068	18.592	10.38	37.94
12:00-14:00	1.778	6.146	8.468	0.586	9.186	5.2328	0.586	1.5365	06:00-08:00	41.48	0.664	6.354	18.668
14:00-16:00	0.574	7.506	4.814	12.86	23.04	9.7588	0.574	1.8765	08:00-10:00	15.524	0	8.068	10.172
16:00-18:00	0.402	7.31	12.34	10.968	17.388	9.6816	0.402	2.742	10:00-12:00	2.588	0.756	31.744	25.682
18:00-20:00	2.172	18.522	18.382	19.332	36.696	19.0208	2.172	4.6305	12:00-14:00	0.586	1.664	6.298	21.118
20:00-22:00	0.74	35.676	35.118	7.808	58.788	27.626	0.74	8.7795	14:00-16:00	12.86	3.226	2.1775	3.514
22:00-24:00	0.696	24.742	26.822	10.712	48.144	22.2232	0.696	6.1855	16:00-18:00	10.968	39.184	3.364	11.246
	25℃								18:00-20:00	19.332	16.184	4.31	33.61
0:00-02:00	11.874	10.34	6.926	26.812	32.706	17.7316			20:00-22:00	7.808	11.406	7.882	105.256
02:00-04:00	6.24	11.448	40.788	68.006	51.598	35.616			22:00-24:00	10.712	29.22	6.316	68.518
04:00-06:00	4.55	17.01	8.386	18.592	48.818	19.4712			第五天5只花刺参的平均值	运动距离
06:00-08:00	8.646	1.952	0.502	0.664	25.862	7.5252				22℃	25℃	28℃	31℃
08:00-10:00	3.2	1.476	0.966	0	1.988	1.526			0:00-02:00	15.468	32.706	13.134	55.188
10:00-12:00	0	2.1	0	0.756	0.932	0.7576			02:00-04:00	17.934	51.598	8.49	67.466
12:00-14:00	0	0.482	0.402	1.664	0	0.5096			04:00-06:00	32.476	48.818	34.83	50.626
14:00-16:00	1.036	0.488	1.378	3.226	5.026	2.2308			06:00-08:00	55.812	25.862	20.108	92.084
16:00-18:00	2.538	0.44	6.706	39.184	15.722	12.918			08:00-10:00	30.652	1.988	13.184	70.906
18:00-20:00	2.834	18.72	14.726	16.184	66.94	23.8808			10:00-12:00	15.234	0.932	10.13	24.202
20:00-22:00	19.88	2.626	8.566	11.406	35.49	15.5936			12:00-14:00	9.186	0	0.746	0.87
22:00-24:00	11.062	0.836	40.554	29.22	21.488	20.632			14:00-16:00	23.04	5.026	0.726	2.258
	28℃								16:00-18:00	17.388	15.722	0.506	0
0:00-02:00	15.416								18:00-20:00	36.696	66.94	19.146	21.688
02:00-04:00	19.022								20:00-22:00	58.788	35.49	8.978	29.462
04:00-06:00	12.206								22:00-24:00	48.144	21.488	12.498	23.944
06:00-08:00	11.126
08:00-10:00	9.786
10:00-12:00	0
12:00-14:00	0
14:00-16:00	0
16:00-18:00	0
18:00-20:00	12.3
20:00-22:00	25.558
22:00-24:00	14.394
	31℃
0:00-02:00	44.892
02:00-04:00	37.122
04:00-06:00	46.136
06:00-08:00	57.132
08:00-10:00	12.536								MEDIAN	75PERCENTILE	MAX
10:00-12:00	2.142								18.788	14.091	55.986
12:00-14:00	3.586								17.934	13.4505	42.906
14:00-16:00	0.538								21.092	15.819	37.068
16:00-18:00	0								18.832	14.124	55.812
18:00-20:00	33.482								10.722	8.0415	30.652
20:00-22:00	35.748								2.588	1.941	15.234
22:00-24:00	55.574								6.146	4.6095	9.186
									7.506	5.6295	23.04
									10.968	8.226	17.388
									18.522	13.8915	36.696
第一天5只花刺参的平均值	运动距离，厘米								35.118	26.3385	58.788
	22℃	22℃	22℃	22℃	22℃				24.742	18.5565	48.144
0:00-02:00	55.986	2.574	19.616	18.788	15.468
02:00-04:00	42.906	12.208	15.298	37.18	17.934
04:00-06:00	21.092	11.678	12.01	37.068	32.476
06:00-08:00	18.832	0	2.27	41.48	55.812
08:00-10:00	1.58	1.028	10.722	15.524	30.652
10:00-12:00	0.426	11.204	1.62	2.588	15.234
12:00-14:00	1.778	6.146	8.468	0.586	9.186
14:00-16:00	0.574	7.506	4.814	12.86	23.04
16:00-18:00	0.402	7.31	12.34	10.968	17.388
18:00-20:00	2.172	18.522	18.382	19.332	36.696
20:00-22:00	0.74	35.676	35.118	7.808	58.788
22:00-24:00	0.696	24.742	26.822	10.712	48.144
	0:00-02:00	02:00-04:00	04:00-06:00	06:00-08:00	08:00-10:00	10:00-12:00	12:00-14:00	14:00-16:00
22℃	55.986	42.906	21.092	18.832	1.58	0.426	1.778	0.574
22℃	2.574	12.208	11.678	0	1.028	11.204	6.146	7.506
22℃	19.616	15.298	12.01	2.27	10.722	1.62	8.468	4.814
22℃	18.788	37.18	37.068	41.48	15.524	2.588	0.586	12.86
22℃	15.468	17.934	32.476	55.812	30.652	15.234	9.186	23.04
25℃	11.874	6.24	4.55	8.646	3.2	0	0	1.036
25℃	10.34	11.448	17.01	1.952	1.476	2.1	0.482	0.488
25℃	6.926	40.788	8.386	0.502	0.966	0	0.402	1.378
25℃	26.812	68.006	18.592	0.664	0	0.756	1.664	3.226
25℃	32.706	51.598	48.818	25.862	1.988	0.932	0	5.026
									16:00-18:00	18:00-20:00	20:00-22:00	22:00-24:00
									0.402	2.172	0.74	0.696
									7.31	18.522	35.676	24.742
									12.34	18.382	35.118	26.822
									10.968	19.332	7.808	10.712
									17.388	36.696	58.788	48.144
									2.538	2.834	19.88	11.062
									0.44	18.72	2.626	0.836
									6.706	14.726	8.566	40.554
									39.184	16.184	11.406	29.22
									15.722	66.94	35.49	21.488
