# Supplementary material for: Influence of Water Temperature and Flow Velocity on Locomotion Behavior in Tropical Commercially Important Sea Cucumber Stichopus monotuberculatus
Source: Frontiers journal article supplement (doi:10.3389/fmars.2022.931430), 2022-07-11
Supplement: Table_5.XLSX [file Table_5.XLSX]

## Sheet: 图6
31℃摄食比例	第一天	第二天	第三天	第四天	第五天	5天平均摄食比例	sd值	28℃摄食比例	第一天	第二天	第三天	第四天	第五天	5天平均摄食比例	sd值	25℃摄食比例	第一天	第二天	第三天	第四天	第五天	5天平均摄食比例	sd值	22℃摄食比例	第一天	第二天	第三天	第四天	第五天	5天平均摄食比例	sd值
06:00-08:00	0.2	0.2	0.2	0.6	0.2	0.28	0.178885	06:00-08:00	0	0	0	0	0	0	0	06:00-08:00	0	0.2	0	0	0	0.04	0.0894427	06:00-08:00	0.2	0	0	0.2	0	0.08	0.109545
08:00-10:00	0.2	0.2	0	0	0	0.08	0.109545	08:00-10:00	0	0.2	0	0	0	0.04	0.0894427	08:00-10:00	0	0	0	0	0.2	0.04	0.0894427	08:00-10:00	0.2	0	0.2	0.4	0	0.16	0.167332
10:00-12:00	0	0.6	0	0.4	0	0.2	0.282843	10:00-12:00	0	0	0.4	0	0	0.08	0.178885	10:00-12:00	0.2	0.2	0.2	0	0.2	0.16	0.0894427	10:00-12:00	0.2	0.2	0.2	0.4	0	0.2	0.141421
12:00-14:00	0	0.2	0	0.4	0	0.12	0.178885	12:00-14:00	0	0	0.4	0	0	0.08	0.178885	12:00-14:00	0.2	0.2	0	0	0	0.08	0.109545	12:00-14:00	0.2	0.2	0	0.4	0	0.16	0.167332
14:00-16:00	0	0.2	0	0.2	0	0.08	0.109545	14:00-16:00	0	0	0.4	0	0	0.08	0.178885	14:00-16:00	0.2	0.2	0	0.2	0	0.12	0.109545	14:00-16:00	0.2	0	0	0.2	0.2	0.12	0.109545
16:00-18:00	0.2	0.2	0	0.2	0	0.12	0.109545	16:00-18:00	0	0	0.2	0	0	0.04	0.0894427	16:00-18:00	0.2	0.2	0.2	0.2	0	0.16	0.0894427	16:00-18:00	0.2	0	0	0.2	0.2	0.12	0.109545
18:00-20:00	0.8	0.6	0.2	0.2	0.4	0.44	0.260768	18:00-20:00	0.2	0	0.2	0	0.2	0.12	0.109545	18:00-20:00	0.4	0.4	0.6	0.6	0.6	0.52	0.109545	18:00-20:00	0.4	0.2	0.6	0.2	0.2	0.32	0.178885
20:00-22:00	0.8	0.4	0.6	0.6	0.4	0.56	0.167332	20:00-22:00	0.2	0	0.2	0	0	0.08	0.109545	20:00-22:00	0.4	0.4	0.4	0.6	0.4	0.44	0.0894427	20:00-22:00	0.2	0	0.4	0.2	0.2	0.2	0.141421
22:00-24:00	0.8	0.2	0.4	0.6	0.4	0.48	0.228035	22:00-24:00	0.2	0	0.2	0	0	0.08	0.109545	22:00-24:00	0.6	0.4	0.2	0.6	0	0.36	0.260768	22:00-24:00	0.2	0	0	0	0.2	0.08	0.109545
00:00-02:00	0.6	0.8	0.6	0.4	0.6	0.6	0.141421	00:00-02:00	0.2	0.4	0	0	0	0.12	0.178885	00:00-02:00	0.2	0.4	0.6	0.4	0	0.32	0.228035	00:00-02:00	0	0	0	0.2	0.2	0.08	0.109545
02:00-04:00	0.6	0.8	0.2	0.2	0.6	0.48	0.268328	02:00-04:00	0.2	0.4	0	0	0	0.12	0.178885	02:00-04:00	0	0.4	0.6	0.2	0	0.24	0.260768	02:00-04:00	0	0	0	0.2	0.2	0.08	0.109545
04:00-06:00	0.8	0.2	0.2	0.2	0.6	0.4	0.282843	04:00-06:00	0	0	0	0	0	0	0	04:00-06:00	0	0.4	0.2	0.2	0	0.16	0.167332	04:00-06:00	0.2	0	0	0	0	0.04	0.0894427
	第一天	第二天	第三天	第四天	第五天	平均	sd		第一天	第二天	第三天	第四天	第五天	平均	sd		第一天	第二天	第三天	第四天	第五天	平均	sd		第一天	第二天	第三天	第四天	第五天	平均	sd
白天	0.1	0.266667	0.0333333	0.3	0.0333333	0.146667	0.114698	白天	0	0.0333333	0.233333	0	0	0.0533333	0.101653	白天	0.133333	0.166667	0.0666667	0.0666667	0.0666667	0.1	0.0471405	白天	0.2	0.0666667	0.0666667	0.3	0.0666667	0.14	0.106458
晚上	0.733333	0.5	0.366667	0.366667	0.5	0.493333	0.149815	晚上	0.166667	0.133333	0.1	0	0.0333333	0.0866667	0.0691215	晚上	0.266667	0.4	0.433333	0.433333	0.166667	0.34	0.11879	晚上	0.166667	0.0333333	0.166667	0.133333	0.166667	0.133333	0.057735
摄食比例（%）
	22℃		25℃		28℃		31℃
06:00-08:00	8	10.9545	4	8.94427	0	0	28	17.8885
08:00-10:00	16	16.7332	4	8.94427	4	8.94427	8	10.9545
10:00-12:00	20	14.1421	16	8.94427	8	17.8885	20	28.2843
12:00-14:00	16	16.7332	8	10.9545	8	17.8885	12	17.8885
14:00-16:00	12	10.9545	12	10.9545	8	17.8885	8	10.9545
16:00-18:00	12	10.9545	16	8.94427	4	8.94427	12	10.9545
18:00-20:00	32	17.8885	52	10.9545	12	10.9545	44	26.0768
20:00-22:00	20	14.1421	44	8.94427	8	10.9545	56	16.7332
22:00-24:00	8	10.9545	36	26.0768	8	10.9545	48	22.8035
00:00-02:00	8	10.9545	32	22.8035	12	17.8885	60	14.1421
02:00-04:00	8	10.9545	24	26.0768	12	17.8885	48	26.8328
04:00-06:00	4	8.94427	16	16.7332	0	0	40	28.2843
