# Supplementary material for: Influence of Water Temperature and Flow Velocity on Locomotion Behavior in Tropical Commercially Important Sea Cucumber Stichopus monotuberculatus
Source: Frontiers journal article supplement (doi:10.3389/fmars.2022.931430), 2022-07-11
Supplement: Table_7.XLSX [file Table_7.XLSX]

## Sheet: Sheet1
	静水												-1				S	L	M	H
	1	2	3	4	5	6	7	8	9	10	平均值	sd值	sd值	平均值		平均运动速度	4.33458	5.4646	4.17257	1.62748
负区运动路程	18.15	6.94	0	0	16.95	15.48	19.45	16.29	8.02	0.65			7.98579	-10.193		SD	1.37	2.44	1.17	1.36
正区	0.69	37.77	21.9	23.73	1.84	2.65	0.31	18.52	18.56	21.28			12.7031	14.725
负区时间	3.5	1.5	0	0	3.5	3.16667	3.83333	3.16667	1.5	0.166667	2.03333	1.57879	1.57879	2.03333		累计停留时间	4.88333	7.58333	10.2833	26.683
正区	0.666667	7	4.5	4.83333	0.333333	0.5	0.166667	3.16667	4.83333	2.5	2.85	2.40042	2.40042	2.85		SD	1.70701	3.8668	4.2434	7.01153
负区速度	5.18571	4.62667	0	0	4.84286	4.88842	5.07391	5.74	5.34667	3.9			2.14183	3.96042
正区	1.035	5.39571	4.86667	4.90966	5.52	5.3	1.86	5.84842	3.84	8.512			2.0996	4.70875
总平均速度	3.11036	5.01119	2.43333	2.45483	5.18143	5.09421	3.46696	5.79421	4.59333	6.206			1.36835	4.33458
累计时间	4.16667	8.5	4.5	4.83333	3.83333	3.66667	4	6.33333	6.33333	2.66667			1.70701	4.88333
	低速												sd值	平均值
负区运动路程	1.54	9.26	2.34	1.05	3.01	25.41	6.18	3.34	14.1	20.99			8.67583	8.722
正区	21.27	10.33	46.17	25.18	16.71	20.19	18.21	32.55	36.31	2.33			12.7849	22.925
负区时间	0.166667	3	0.5	0.166667	0.666667	5.16667	0.333333	0.666667	4.66667	4.5	1.7037	2.10004	2.10004	1.98333
正区	6.83333	2.66667	9.66667	5.66667	3.16667	4.66667	3.5	7.66667	11.8333	0.333333	6.18519	3.47584	3.47584	5.6
负区速度	9.24	3.08667	4.68	6.3	4.515	4.91806	18.54	5.01	3.02143	4.66444			4.61279	6.39756
正区	3.11268	3.87375	4.77621	4.44353	5.27684	4.32643	5.20286	4.24565	3.06845	6.99			1.1464	4.53164
总平均速度	6.17634	3.48021	4.7281	5.37176	4.89592	4.62225	11.8714	4.62783	3.04494	5.82722			2.44409	5.4646
累计时间	7	5.66667	10.1667	5.83333	3.83333	9.83333	3.83333	8.33333	16.5	4.83333			3.8668	7.58333
	中速												sd值	平均值
负区运动路程	32.01	6.52	0.13	18.04	8.31	0	16.31	25.74	16.59	29.8			11.5413	15.345
正区	34.12	17.38	33.93	10.25	25.65	36.64	30.97	9.07	46.31	20.31			12.1041	26.463
负区时间	7.33333	0.833333	0.166667	6.33333	1.5	0	4	8.83333	3.33333	12.8333	3.59259	4.25169	4.25169	4.51667
正区	5.66667	3.83333	9.16667	1.83333	5.16667	5.5	6.66667	2.83333	12.8333	4.16667	5.94444	3.21666	3.21666	5.76667
负区速度	4.365	7.824	0.78	2.84842	5.54	0	4.0775	2.91396	4.977	2.32208			2.3066	3.5648
正区	6.02118	4.53391	3.70145	5.59091	4.96452	6.66182	4.6455	3.20118	3.60857	4.8744			1.09996	4.78034
总平均速度	5.19309	6.17896	2.24073	4.21967	5.25226	3.33091	4.3615	3.05757	4.29279	3.59824			1.16898	4.17257
累计时间	13	4.66667	9.33333	8.16667	6.66667	5.5	10.6667	11.6667	16.1667	17			4.2434	10.2833
	高速												sd值	平均值
负区运动路程	0	4.57	16.07	11.74	11.96	11.9	18.6	16.2	28.98	0.87			8.75066	12.089
正区	16.45	15.93	45.26	11.75	21.14	13.36	31.88	42.22	13.12	19.93			12.3223	23.104
负区时间	0	4	4	9	12	19	5.16	10	18	1	9.01778	6.62151	6.62151	8.216
正区	30	26	10.5	21	18	11	7.17	20	12	29	17.2967	8.15379	8.15379	18.467
负区速度	0	1.1425	4.0175	1.30444	0.996667	0.626316	3.60465	1.62	1.61	0.87			1.27195	1.57921
正区	0.548	0.612692	4.31048	0.559524	1.17444	1.21455	4.4463	2.111	1.09333	0.687241			1.49946	1.67576
总平均速度	0.274	0.877596	4.16399	0.931984	1.08556	0.920431	4.02548	1.8655	1.35167	0.778621			1.36256	1.62748
累计时间	30	30	14.5	30	30	30	12.33	30	30	30			7.01153	26.683
