# Supplementary material for: Influence of Water Temperature and Flow Velocity on Locomotion Behavior in Tropical Commercially Important Sea Cucumber Stichopus monotuberculatus
Source: Frontiers journal article supplement (doi:10.3389/fmars.2022.931430), 2022-07-11
Supplement: Table_9.XLSX [file Table_9.XLSX]

## Sheet: 数据统计
	静水															0	4.7±1.2	10.5±1.7	20.8±3.4
	1	2	3	4	5	6	7	8	9	10	平均值	sd值	sd值	平均值	负区速度	-3.96714	-5.0484	-3.5648	-1.57921
负区运动路程	18.15	6.94	0	0	16.95	15.48	19.45	16.29	8.02	0.65			7.98579	10.193	sd	-2.14183	-1.86008	-2.3066	-1.27195
正区	0.69	37.77	21.9	23.73	1.84	2.65	0.31	18.52	18.56	21.28			12.7031	14.725	正区速度	4.70875	4.53164	4.78034	1.67576
负区时间	3.5	1.5	0	0	3.5	3.16667	3.83333	3.16667	1.5	0.166667	2.03333	1.57879	1.57879	2.03333	sd	2.0996	1.1464	1.09996	1.49946
正区	0.666667	7	4.5	4.83333	0.333333	0.5	0.166667	3.16667	4.83333	2.5	2.85	2.40042	2.40042	2.85
负区速度	5.18571	4.62667	0	0	4.84286	4.88842	5.07391	5.74	5.34667	3.9			2.14183	3.96042
正区	1.035	5.39571	4.86667	4.90966	5.52	5.3	1.86	5.84842	3.84	8.512			2.0996	4.70875
	低速												sd值	平均值
负区运动路程	1.54	9.26	2.34	1.05	3.01	25.41	6.18	3.34	14.1	20.99			8.67583	8.722
正区	21.27	10.33	46.17	25.18	16.71	20.19	18.21	32.55	36.31	2.33			12.7849	22.925
负区时间	0.166667	3	0.5	0.166667	0.666667	5.16667	0.333333	0.666667	4.66667	4.5	1.98333	2.10004	2.10004	1.98333
正区	6.83333	2.66667	9.66667	5.66667	3.16667	4.66667	3.5	7.66667	11.8333	0.333333	5.6	3.47584	3.47584	5.6
负区速度	9.24	3.08667	4.68	6.3	4.515	4.91806	18.54	5.01	3.02143	4.66444			4.61279	6.39756
正区	3.11268	3.87375	4.77621	4.44353	5.27684	4.32643	5.20286	4.24565	3.06845	6.99			1.1464	4.53164
	中速												sd值	平均值
负区	32.01	6.52	0.13	18.04	8.31	0	16.31	25.74	16.59	29.8			11.5413	15.345
正区	34.12	17.38	33.93	10.25	25.65	36.64	30.97	9.07	46.31	20.31			12.1041	26.463
负区时间	7.33333	0.833333	0.166667	6.33333	1.5	0	4	8.83333	3.33333	12.8333	4.51667	4.25169	4.25169	4.51667
正区	5.66667	3.83333	9.16667	1.83333	5.16667	5.5	6.66667	2.83333	12.8333	4.16667	5.76667	3.21666	3.21666	5.76667
负区速度	4.365	7.824	0.78	2.84842	5.54	0	4.0775	2.91396	4.977	2.32208			2.3066	3.5648
正区	6.02118	4.53391	3.70145	5.59091	4.96452	6.66182	4.6455	3.20118	3.60857	4.8744			1.09996	4.78034
	高速												sd值	平均值
负区	0	4.57	16.07	11.74	11.96	11.9	18.6	16.2	28.98	0.87			8.75066	12.089
正区	16.45	15.93	45.26	11.75	21.14	13.36	31.88	42.22	13.12	19.93			12.3223	23.104
负区时间	0	4	4	9	12	19	5.16	10	18	1	8.216	6.62151	6.62151	8.216
正区	30	26	10.5	21	18	11	7.17	20	12	29	18.467	8.15379	8.15379	18.467
负区速度	0	1.1425	4.0175	1.30444	0.996667	0.626316	3.60465	1.62	1.61	0.87			1.27195	1.57921
正区	0.548	0.612692	4.31048	0.559524	1.17444	1.21455	4.4463	2.111	1.09333	0.687241			1.49946	1.67576
